# Supplementary material
Source: Springer Nature journal article supplement (https://www.springermedizin.de/resource/supplementary/13058_2004_933_MOESM12_ESM.pdf/9705678)

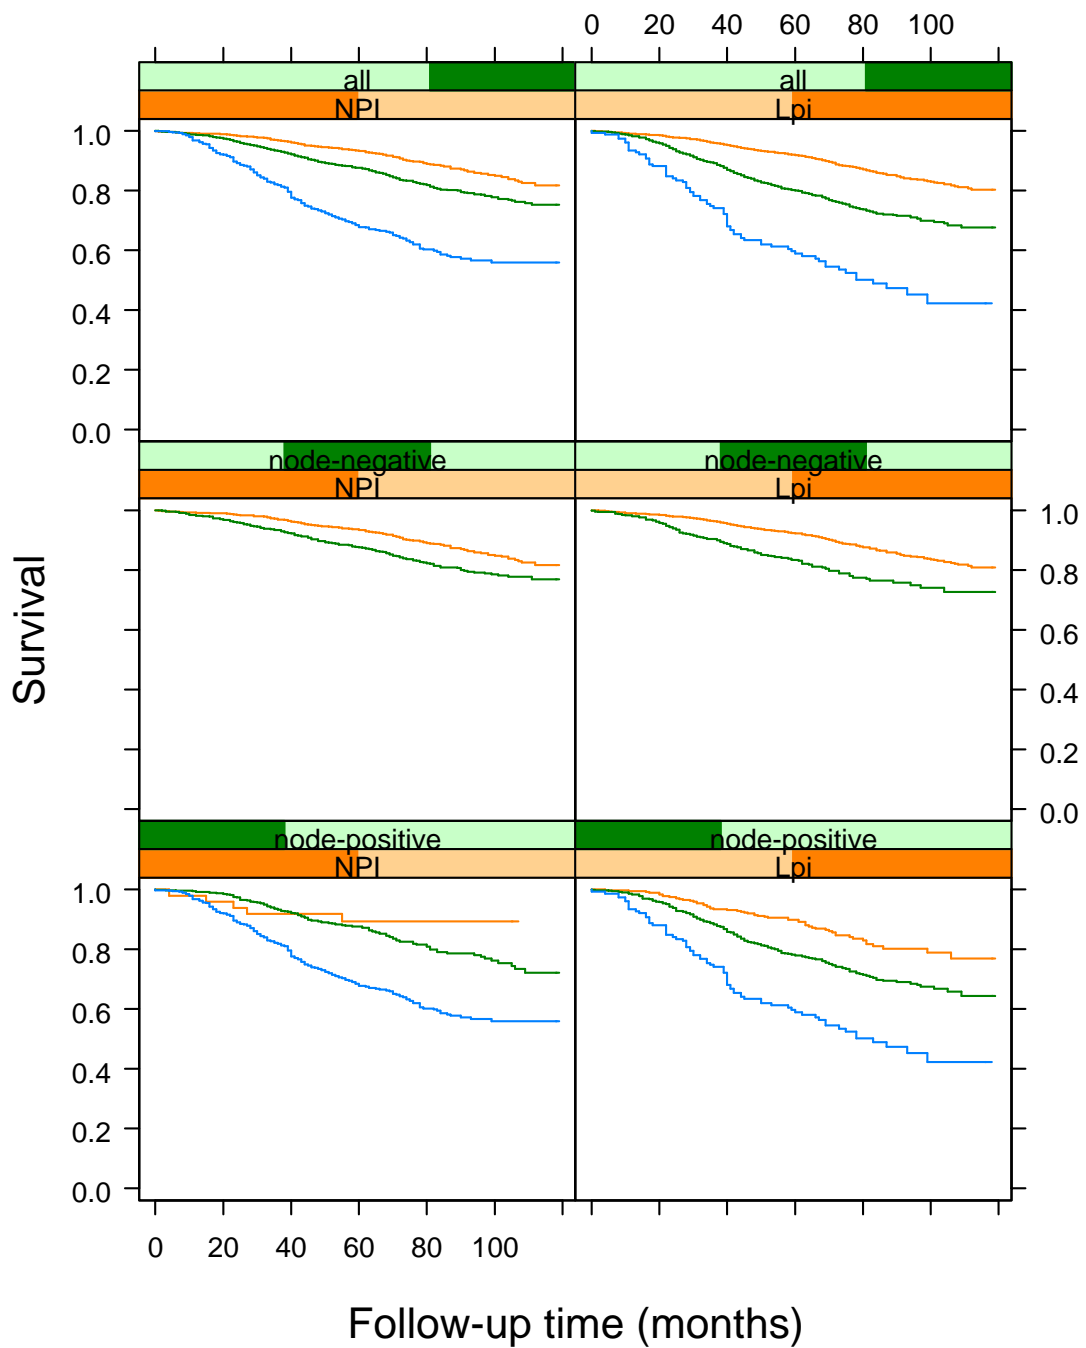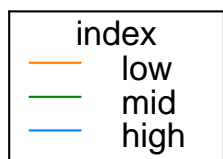

Supplement: MOESM12 [file 9705678]
